# Supplementary material for: Knowledge of Patient’s Health Rights among Medical Students in Jeddah, Saudi Arabia 2020 – A Cross Sectional Study
Source: Research Square preprint supplement (doi:10.21203/rs.3.rs-114983/v1), 2020-12-15
Supplement: Supplementary file 2 [file e0953099e0e0505508b4cf12.docx]

**Study Novelty**

***What is already known about the study?***

- Declaration about rights of patients is still vague concept for health care workers and patients.
- In order to insure healthy and high-quality lifestyle for human beings medical students as well as health care workers need to understand and accommodate the patient’s health rights.

***Study Contribution/Value***

- The knowledge regarding the rights of female, reproductive, elderly, special needs, disabled, and cancer patients was poor among the study participants.

***Practical Implications on the field of Study***

- There is need to transform and enhance knowledge of the existing laws and regulations regarding the health rights of all patient groups for delivering optimal health care.
